# Supplementary material
Source: ML conference proceedings conference paper supplement (https://openreview.net/forum?id=FO6tePGRZj)
Supplement: supplementary_material [file attachment]

# Supplementary Materials for Mobile ALOHA: Learning Bimanual Mobile Manipulation using Low-Cost Whole-Body Teleoperation

Anonymous Author(s)

Affiliation

Address

email

## 1 High Five

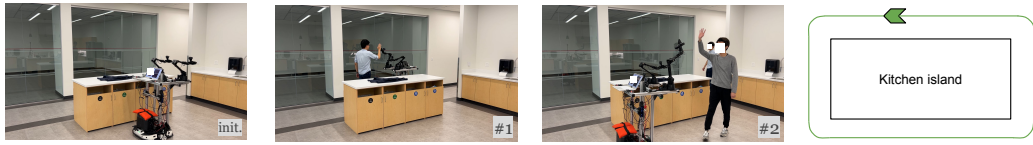

**High Five:** The robot base is initialized next to the kitchen island. The robot keeps moving around the kitchen island until a human is in front of it, then high five with the human. Each demo has 2000 steps or 40 seconds, and typically contains 3-4 high fives.

Figure 1: *Task Definition of High Five.*

We include the illustration for the *High Five* task in Figure 1. The robot needs to go around the kitchen island, and whenever a human approach it from the front, stop moving and high five with the human. After the high five, the robot should continue moving only when the human moves out of its path. We collect data wearing different clothes and evaluate the trained policy on unseen persons and unseen attires. While this task does not require a lot of precision, it highlights *Mobile ALOHA*'s potential for studying human-robot interactions.

## 2 Example Image Observations

Figure 2 showcases example images of *Wipe Wine* captured during data collection. The images, arranged sequentially in time from top to bottom, are sourced from three different camera angles from left to right columns: the top egocentric camera, the left wrist camera, and the right wrist camera. The top camera is stationary with respect to the robot frame. In contrast, the wrist cameras are attached to the arms, providing close-up views of the gripper in action. All cameras are set with a fixed focal length and feature auto-exposure to adapt to varying light conditions. These cameras stream at a resolution of  $480 \times 640$  and a frame rate of 30 frames per second.

## 3 Experiment Details and Hyperparameters of ACT, Diffusion Policy and VINN

We carefully tune the baselines and include the hyperparameters for the baselines and co-training in Table 1, 2, 3, 4, 5.

## 4 Open-Loop Replaying Errors

Figure 3 shows the spread of end-effector error at the end of replaying a 300 steps (6s) demonstration. The demonstration contains a 180 degree turn with radius of roughly 1m. At the end of the trajectory,

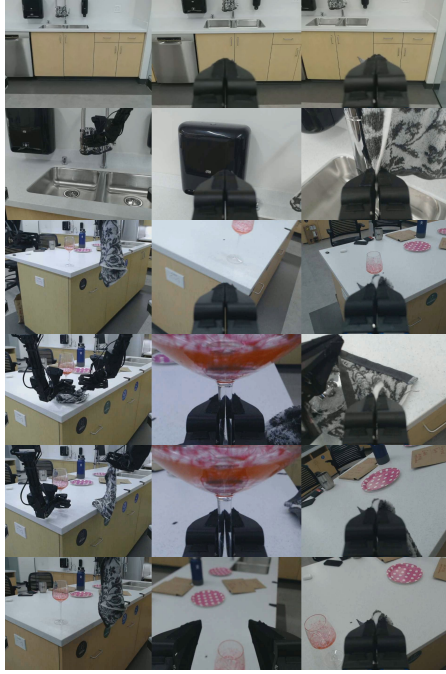

Figure 2: **Example Image Observations of Wipe Wine.** We show the observations from the top camera, left wrist camera and right wrist camera from left to right columns. These images are arranged sequentially in time from top to bottom.

|                                            |     |
|--------------------------------------------|-----|
| sample prob. from <i>Mobile ALOHA</i> data | 0.5 |
| sample prob. from <i>ALOHA</i> data        | 0.5 |

Table 1: **Hyperparameters of co-training.**

|                       |                        |
|-----------------------|------------------------|
| learning rate         | 2e-5                   |
| batch size            | 16                     |
| # encoder layers      | 4                      |
| # decoder layers      | 7                      |
| feedforward dimension | 3200                   |
| hidden dimension      | 512                    |
| # heads               | 8                      |
| chunk size            | 45                     |
| beta                  | 10                     |
| dropout               | 0.1                    |
| backbone              | pretrained ResNet18[1] |

Table 2: **Hyperparameters of ACT.**

23 the right arm would reach out to a piece of paper on the table and tap it gently. The tapping position  
 24 are then marked on the paper. The red cross denotes the original tapping position, and the red dots  
 25 are 20 replays of the same trajectory. We observe significant error when replaying the base velocity  
 26 profile, which is expected due to the stochasticity of the ground contact and low-level controller.  
 27 Specifically, all replay points are biased to the left side by roughly 10cm, and spread along a line  
 28 of roughly 20cm. We found our policy to be capable of correcting such errors without explicit  
 29 localization such as SLAM.

|                                |                                                                                                                                |
|--------------------------------|--------------------------------------------------------------------------------------------------------------------------------|
| learning rate                  | 1e-4                                                                                                                           |
| batch size                     | 32                                                                                                                             |
| chunk size                     | 64                                                                                                                             |
| scheduler                      | DDIM[2]                                                                                                                        |
| train and test diffusion steps | 50, 10                                                                                                                         |
| ema power                      | 0.75                                                                                                                           |
| backbone                       | pretrained ResNet18[1]                                                                                                         |
| noise predictor                | UNet[3]                                                                                                                        |
| image augmentation             | RandomCrop(ratio=0.95) &<br>ColorJitter(brightness=0.3, contrast=0.4, saturation=0.5) &<br>RandomRotation(degrees=[-5.0, 5.0]) |

Table 3: *Hyperparameters of Diffusion Policy.*

|               |        |
|---------------|--------|
| learning rate | 3e-4   |
| batch size    | 128    |
| epochs        | 100    |
| momentum      | 0.9    |
| weight decay  | 1.5e-6 |

Table 4: *Hyperparameters of BYOL*, the feature extractor of VINN.

|                       |                                         |
|-----------------------|-----------------------------------------|
| k (nearest neighbour) | selected with lowest validation loss    |
| chunk size            | 100                                     |
| state weight          | 5                                       |
| camera feature weight | 1:1:1 (for front, left and right wrist) |

Table 5: *Hyperparameters of VINN + Chunking.*

## References

- [1] K. He, X. Zhang, S. Ren, and J. Sun. Deep residual learning for image recognition. *2016 IEEE Conference on Computer Vision and Pattern Recognition (CVPR)*, pages 770–778, 2015.
- [2] J. Song, C. Meng, and S. Ermon. Denoising diffusion implicit models. *arXiv preprint arXiv:2010.02502*, 2020.
- [3] O. Ronneberger, P. Fischer, and T. Brox. U-net: Convolutional networks for biomedical image segmentation. *ArXiv*, abs/1505.04597, 2015. URL <https://api.semanticscholar.org/CorpusID:3719281>.

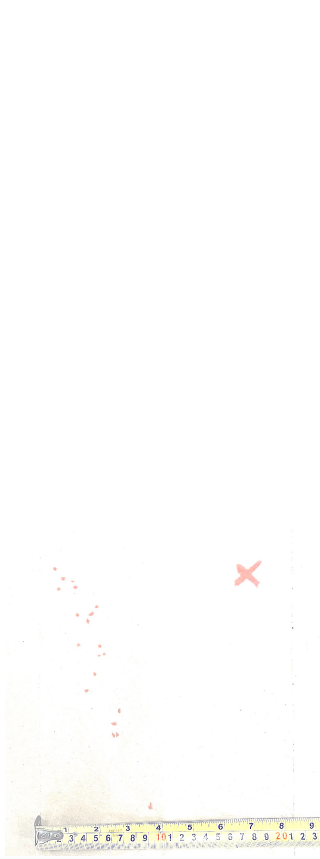

Figure 3: *Open-loop Replay Errors*. We mark the right arm end-effector position on a piece of paper for the original episode (red cross), and 20 replays of the same episode (red dots).
